# Supplementary material
Source: publisher figshare collection journal article supplement (https://gsajournals.figshare.com/ndownloader/files/15041084)
Supplement: Supplementary file 1 [file 15041084]

Individual 1

Locus 1

Locus 2

Locus 3

COV = 3

COV = 3

COV = 5
